# Supplementary material for: Ultralong room-temperature phosphorescence of a solid-state supramolecule between phenylmethylpyridinium and cucurbit[6]uril
Source: Chem Sci. 2019 Jul 1;10(33):7773–8. doi: 10.1039/c9sc02633a (PMC6764277; doi:10.1039/c9sc02633a)
Supplement: Supplementary file 1 [file SC-010-C9SC02633A-s001.pdf]

## Supporting Information

### Ultralong Room-Temperature Phosphorescence of Solid-State Supramolecule between Phenylmethylpyridinium and Cucurbit[6]uril

*Zhi-Yuan Zhang,<sup>†</sup> and Yu Liu<sup>\*,†</sup>*

<sup>†</sup>. College of Chemistry, State Key Laboratory of Elemento-Organic Chemistry,  
Nankai University, Tianjin 300071, P. R. China.

#### **Corresponding Author**

\*Email: [yuliu@nankai.edu.cn](mailto:yuliu@nankai.edu.cn)

|                                                                                    |       |
|------------------------------------------------------------------------------------|-------|
| Synthesis of PX .....                                                              | 3     |
| Figures S1-14: <sup>1</sup> H NMR, <sup>13</sup> C NMR and HRMS spectra of PX..... | 3-10  |
| Figure S15: Photophysical properties of PBC.....                                   | 10    |
| Figure S16: Time-resolved PL decay of PBC/CB[6].....                               | 11    |
| Figure S17: Quantum efficiency of PBC/CB[6]. .....                                 | 11    |
| Figure S18: XRD patterns of PBC/CB[6]. .....                                       | 12    |
| Figures S19-21: Photophysical properties of PX/CB[6] .....                         | 12-13 |
| Figure S22: Photophysical properties of PFC, PCC and PIC.....                      | 14    |
| Figure S23: Photophysical properties of PEC/CB[6] and PC/CB[6] .....               | 15    |
| Figure S24: Photophysical properties of PEC and PC .....                           | 15    |
| Figure S25: High resolution MALDI-TOF MS of PX/CB[6]. .....                        | 16    |
| Figures S26-30: <sup>1</sup> H NMR spectra of PX and PX/CB[6]. .....               | 17-19 |
| Figures S31-33: Quantum efficiency of PX/CB[6]. .....                              | 19-20 |

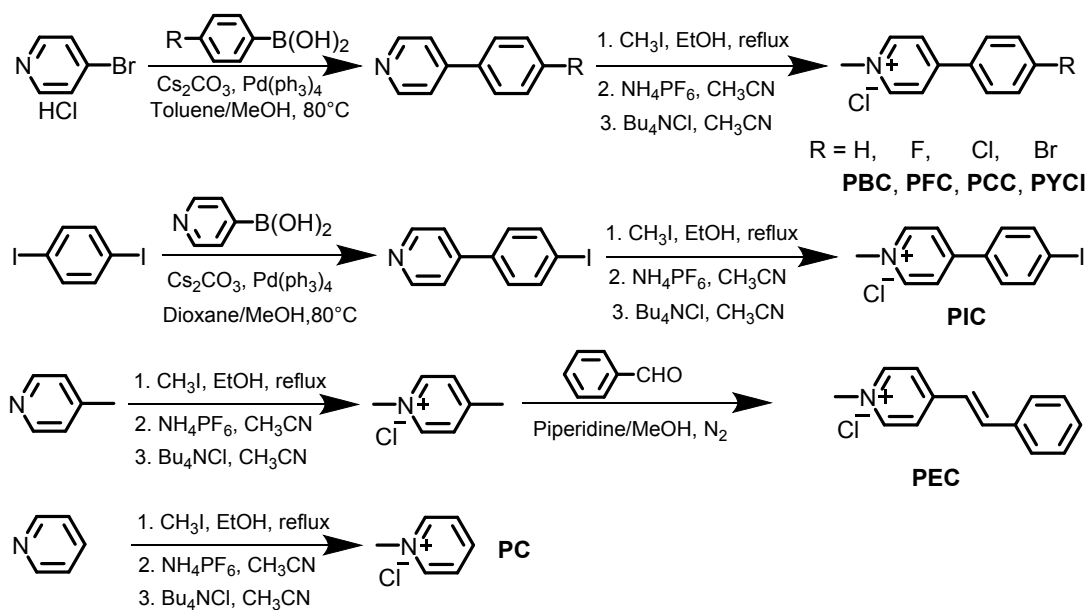

## Synthesis of PX

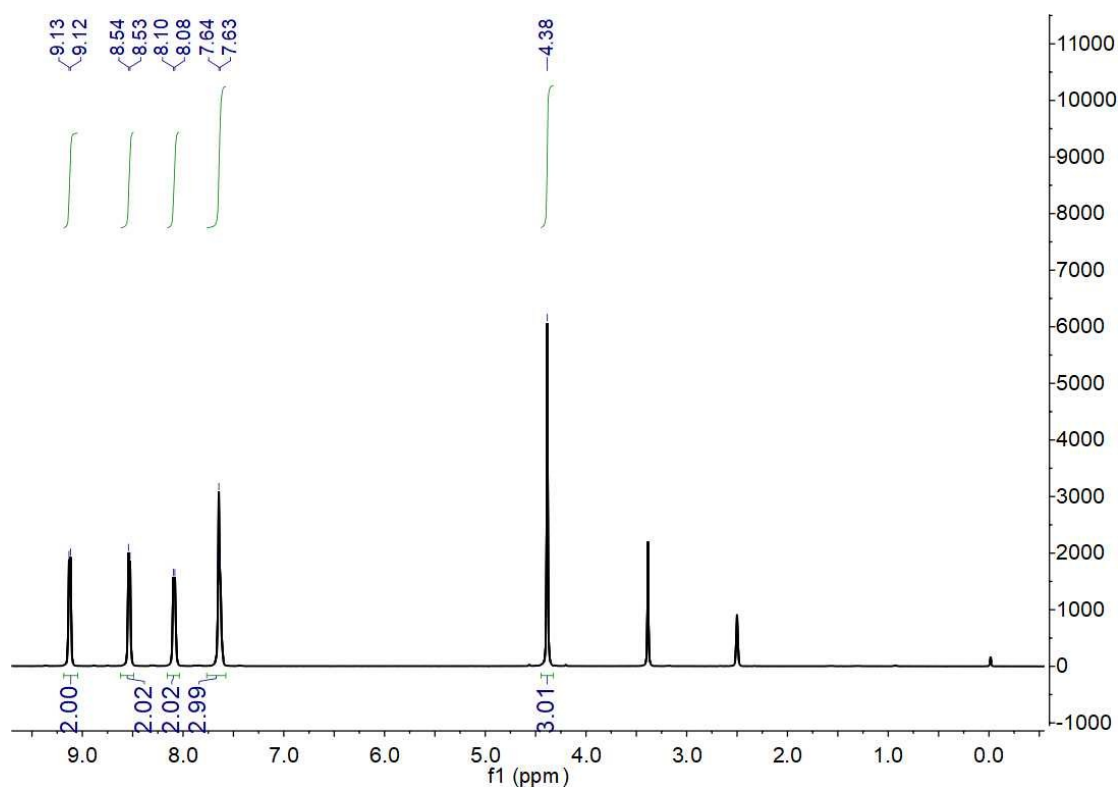

**Figure S1.** <sup>1</sup>H NMR (400 MHz, DMSO-d<sub>6</sub>, 298 K) spectrum of PBC (3.0 mM).

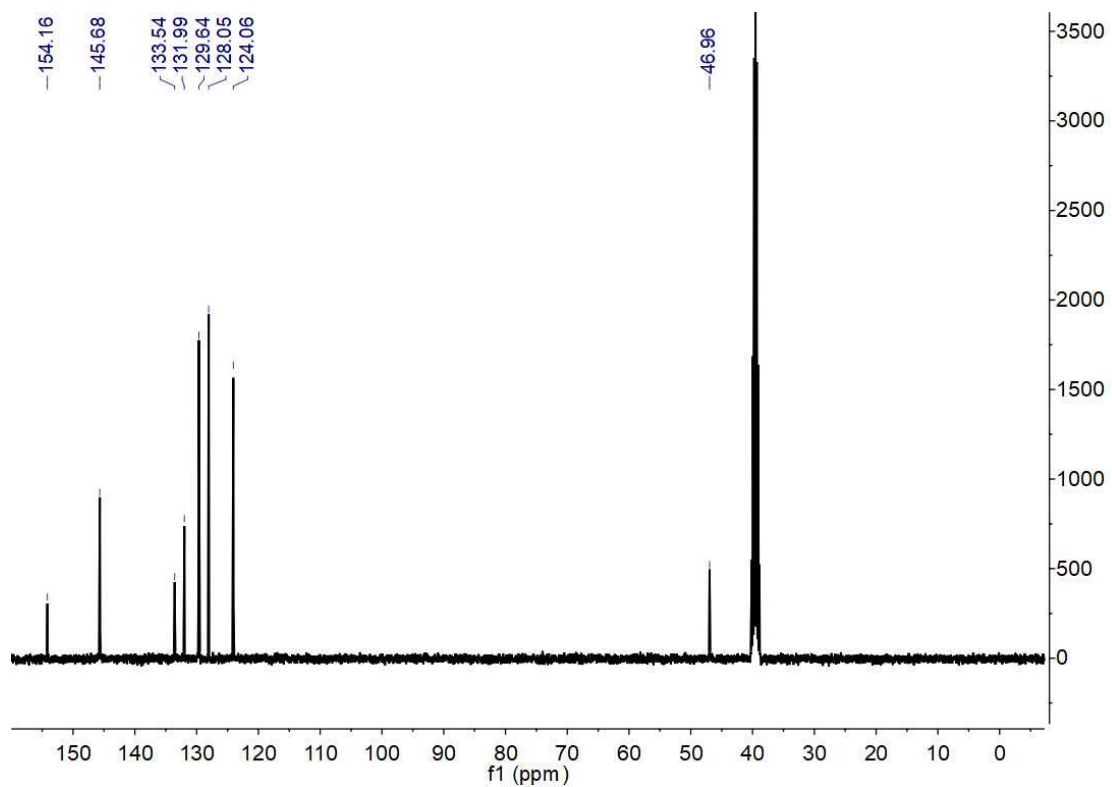

**Figure S2.** <sup>13</sup>C NMR (101 MHz, DMSO-d<sub>6</sub>, 298 K) spectrum of PBC (3.0 mM).

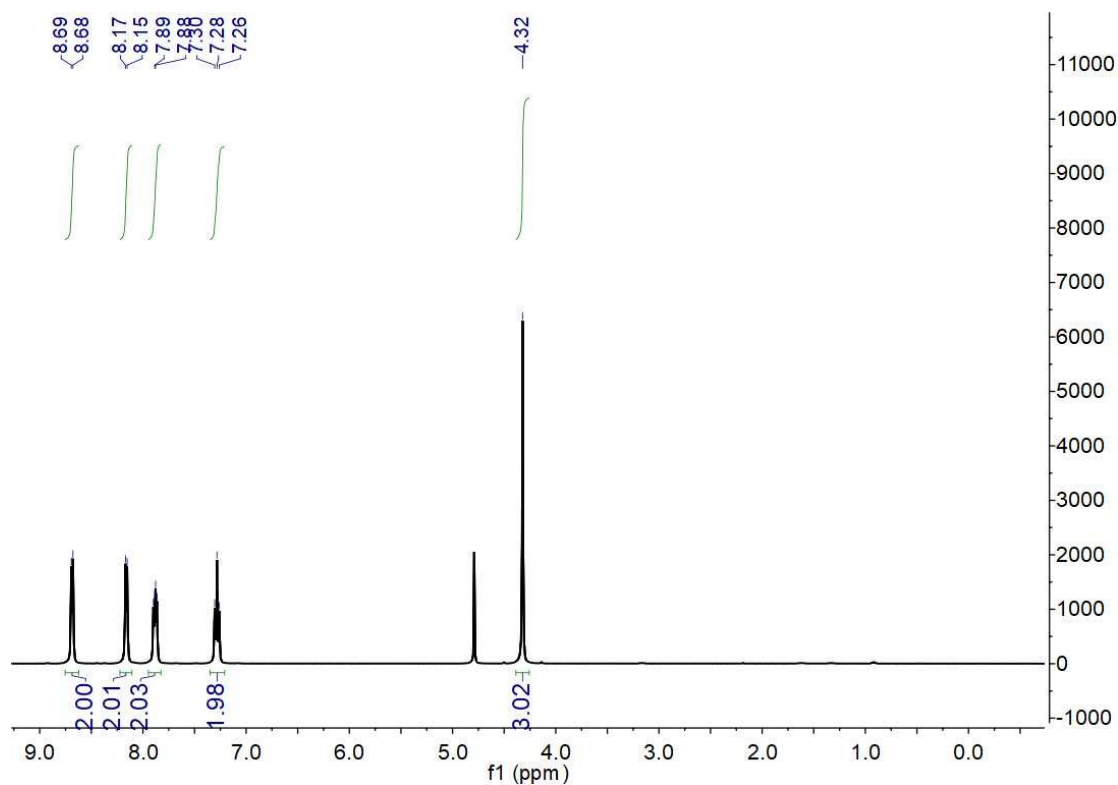

**Figure S3.** <sup>1</sup>H NMR (400 MHz, D<sub>2</sub>O, 298 K) spectrum of PFC (3.0 mM).

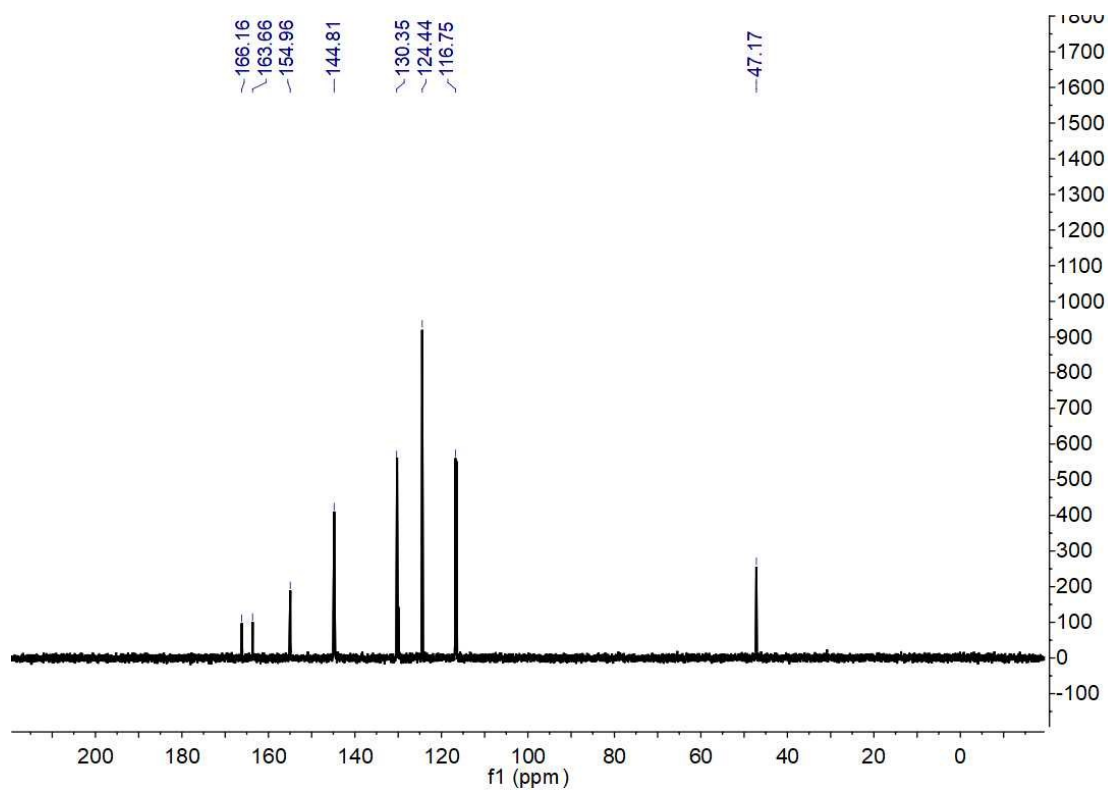

**Figure S4.**  $^{13}\text{C}$  NMR (101 MHz,  $\text{D}_2\text{O}$ , 298 K) spectrum of PFC (3.0 mM).

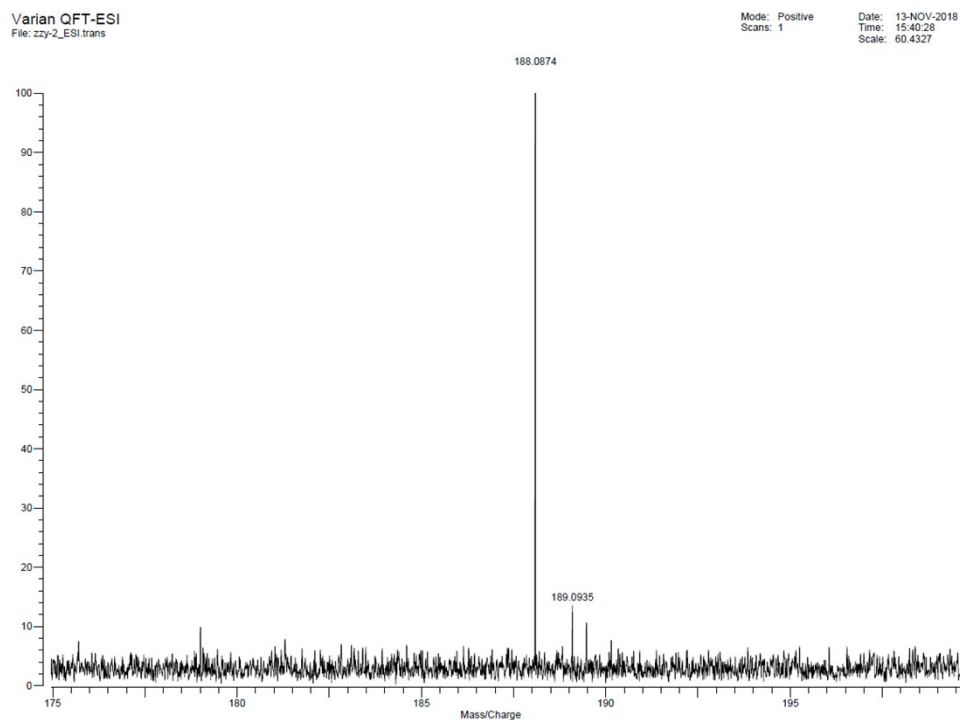

**Figure S5.** HRMS (ESI) spectrum of PFC.

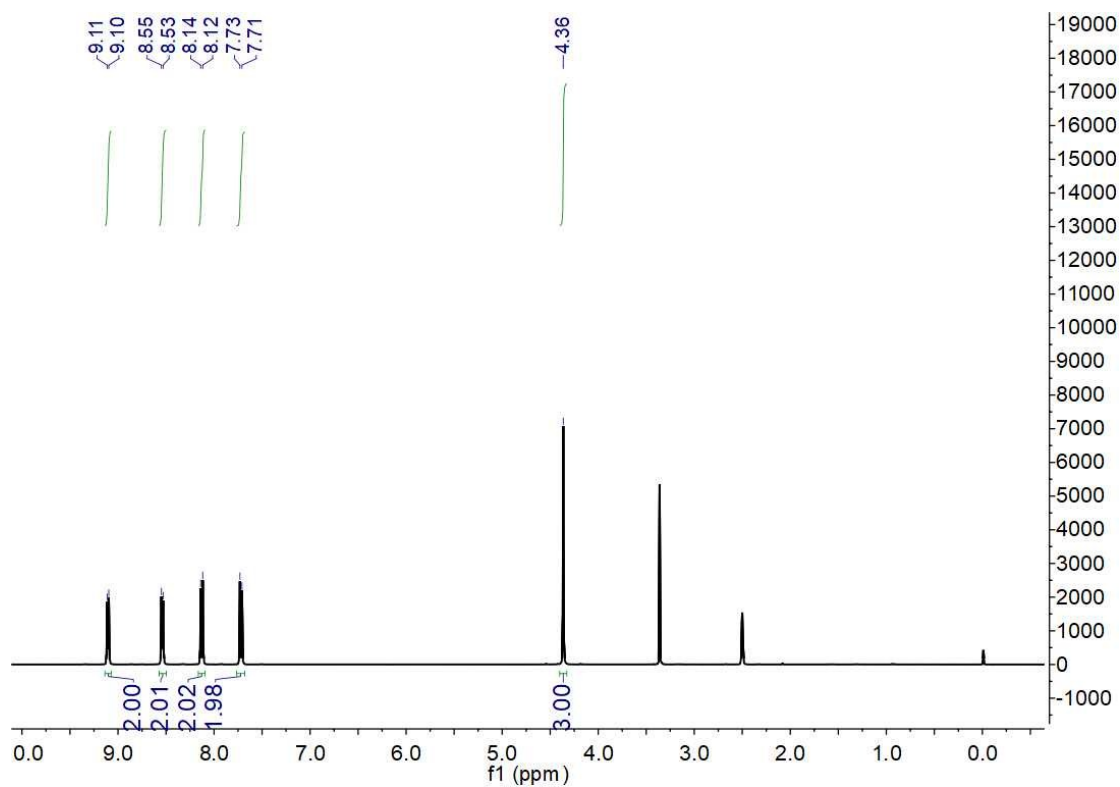

**Figure S6.** <sup>1</sup>H NMR (400 MHz, DMSO-d<sub>6</sub>, 298 K) spectrum of PCC (3.0 mM).

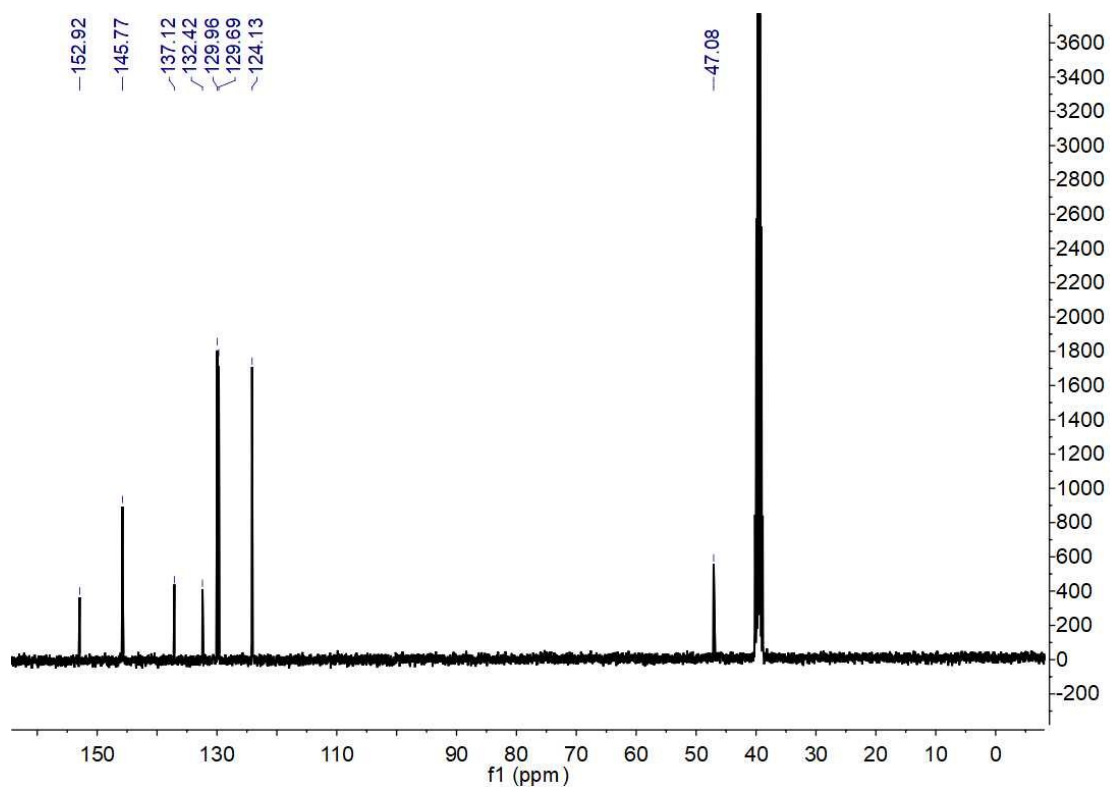

**Figure S7.** <sup>13</sup>C NMR (101 MHz, DMSO-d<sub>6</sub>, 298 K) spectrum of PCC (3.0 mM).

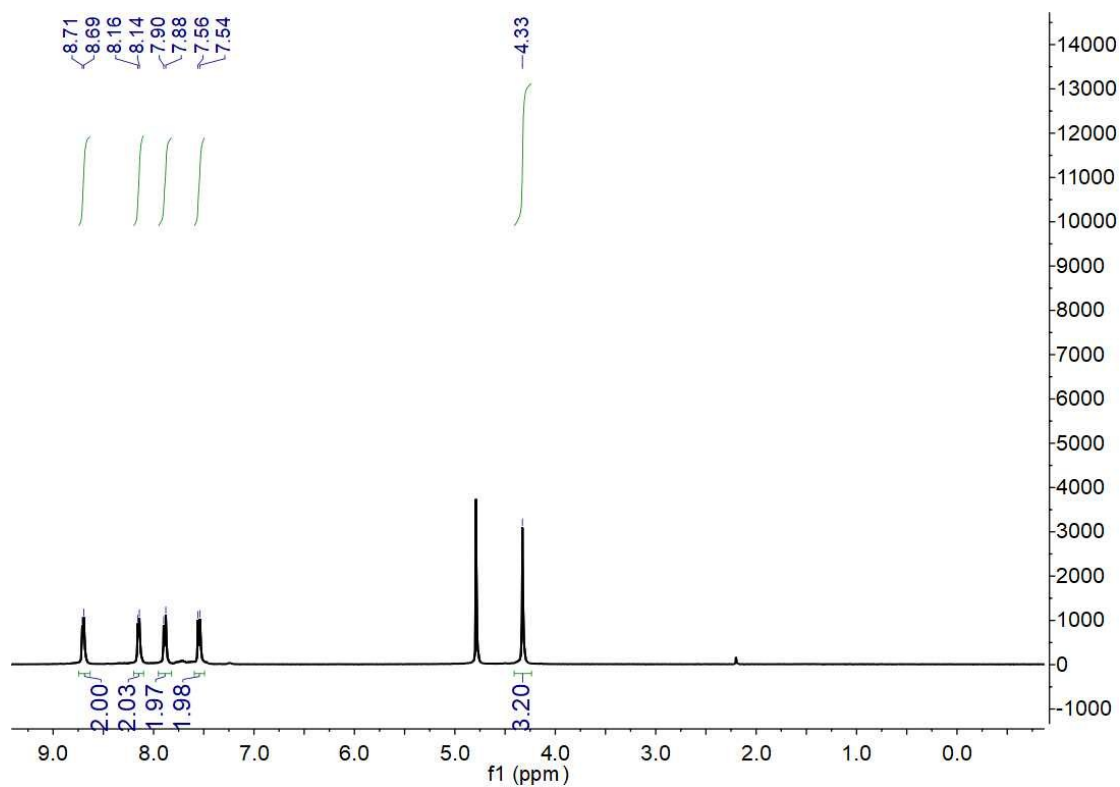

**Figure S8.** <sup>1</sup>H NMR (400 MHz, D<sub>2</sub>O, 298 K) spectrum of PIC (3.0 mM).

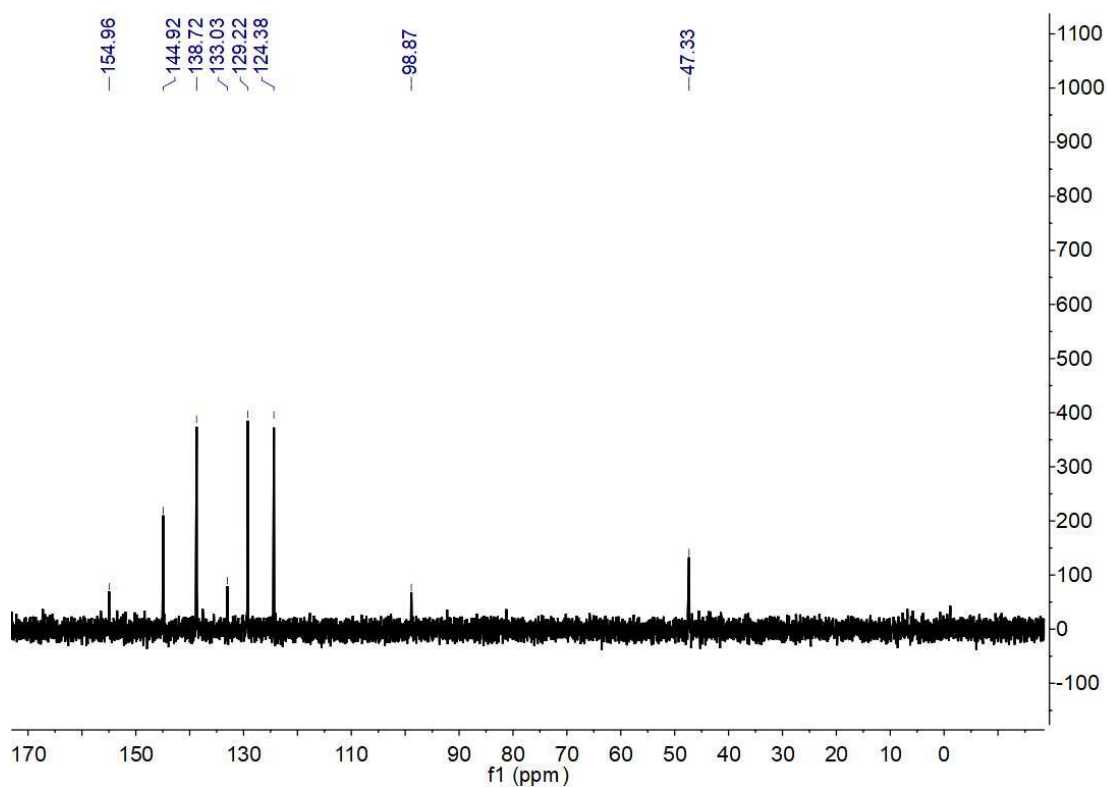

**Figure S9.** <sup>13</sup>C NMR (101 MHz, D<sub>2</sub>O, 298 K) spectrum of PIC (3.0 mM).

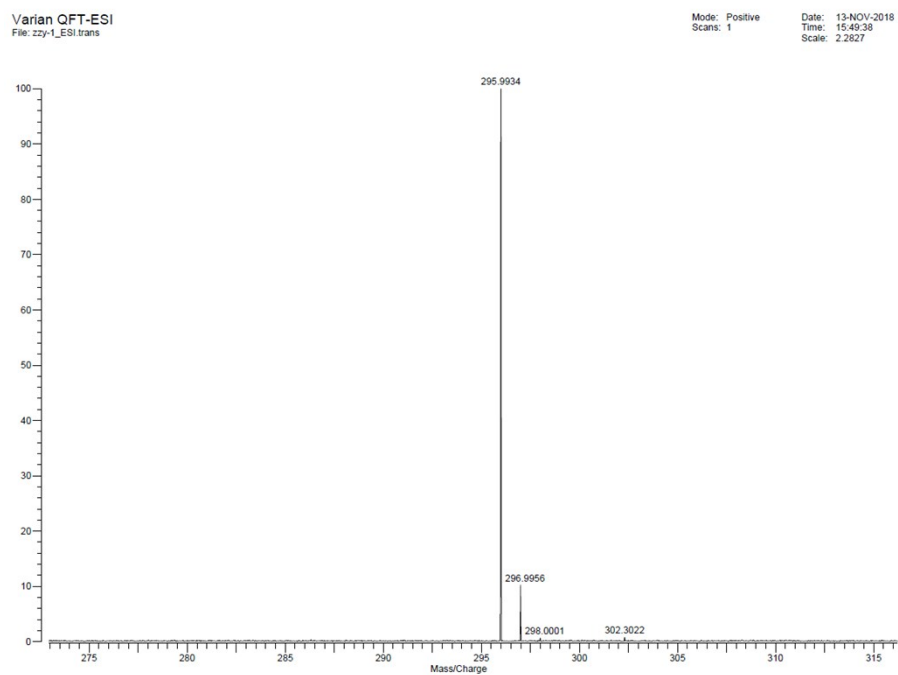

**Figure S10.** HRMS (ESI) spectrum of PIC.

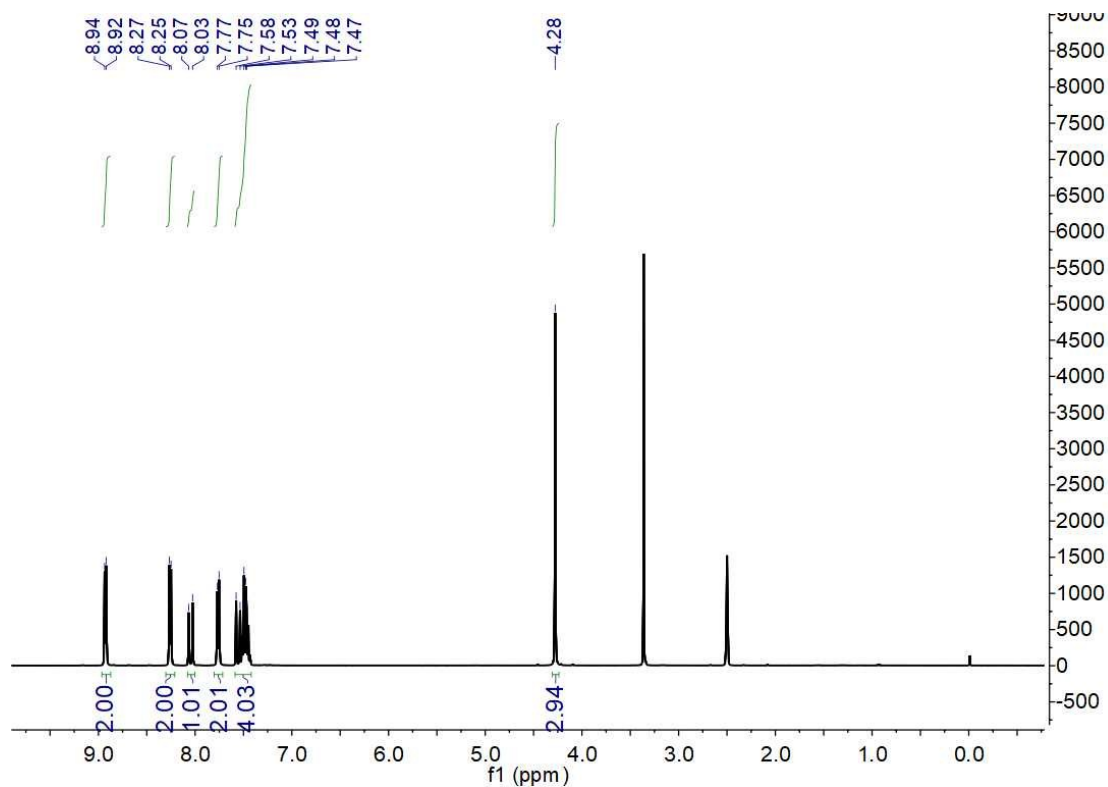

**Figure S11.**  $^1\text{H}$  NMR (400 MHz,  $\text{DMSO-d}_6$ , 298 K) spectrum of PEC (3.0 mM).

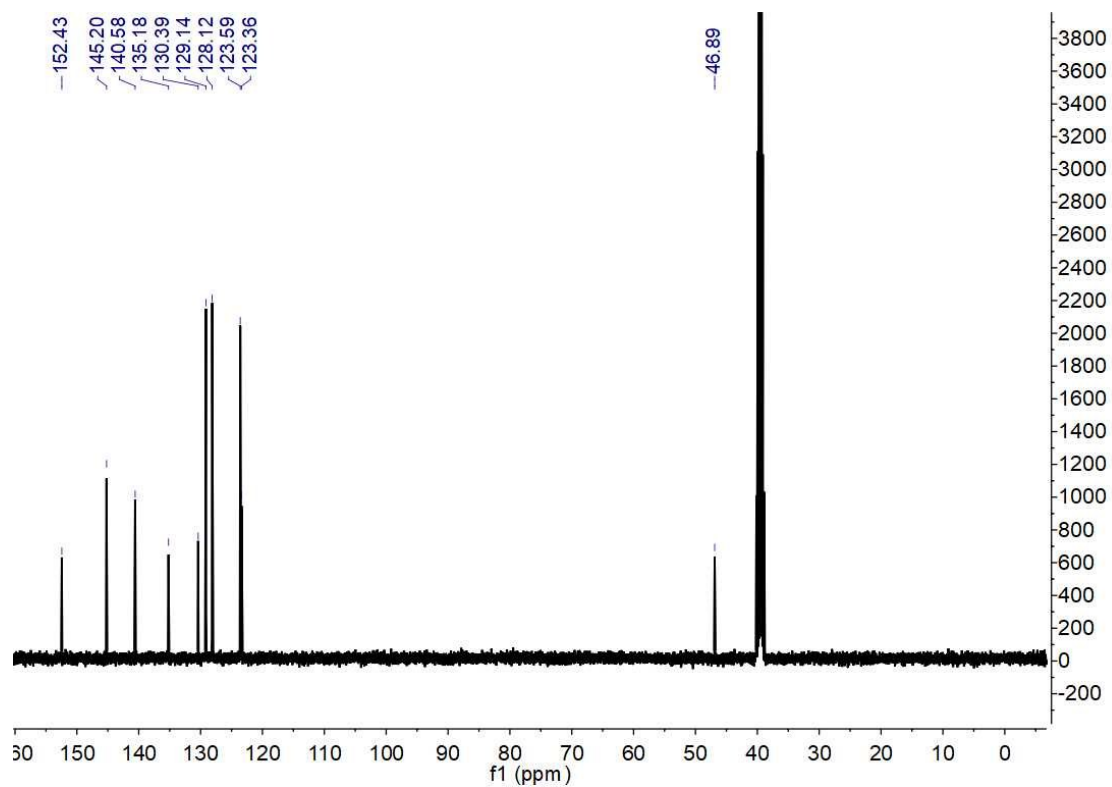

**Figure S12.**  $^{13}\text{C}$  NMR (101 MHz,  $\text{DMSO-d}_6$ , 298 K) spectrum of PEC (3.0 mM).

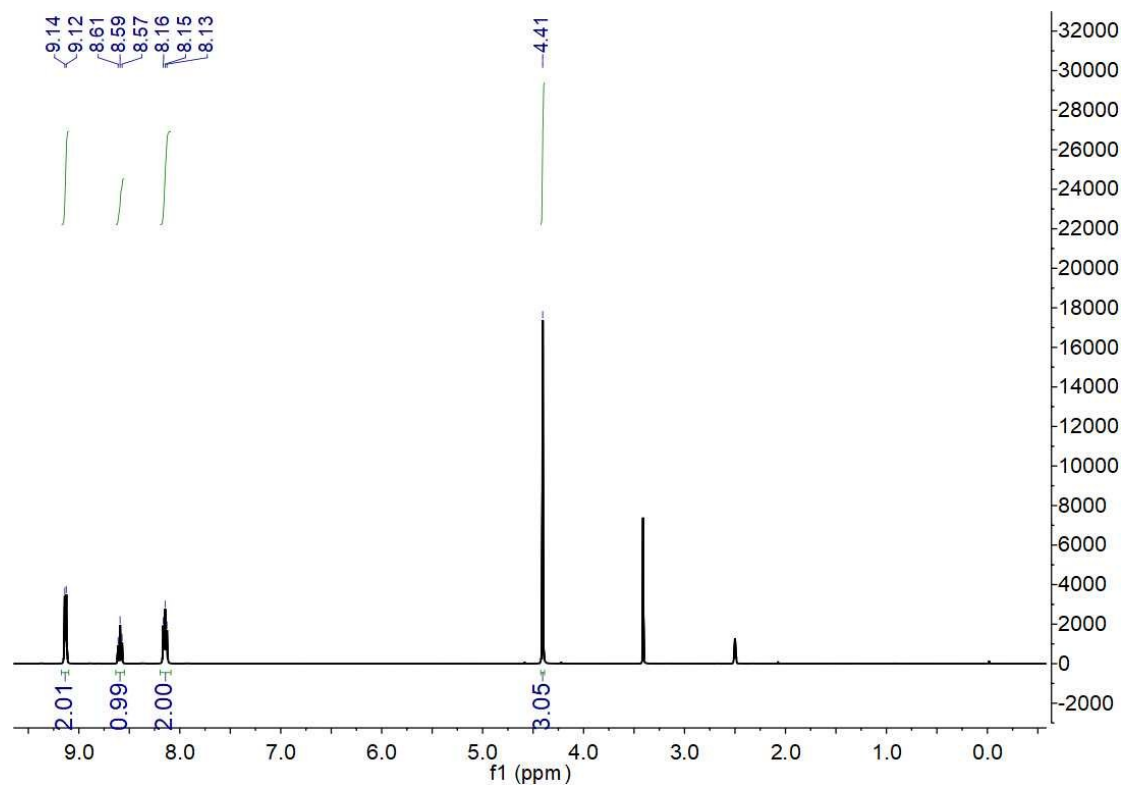

**Figure S13.**  $^1\text{H}$  NMR (400 MHz,  $\text{DMSO-d}_6$ , 298 K) spectrum of PC (3.0 mM).

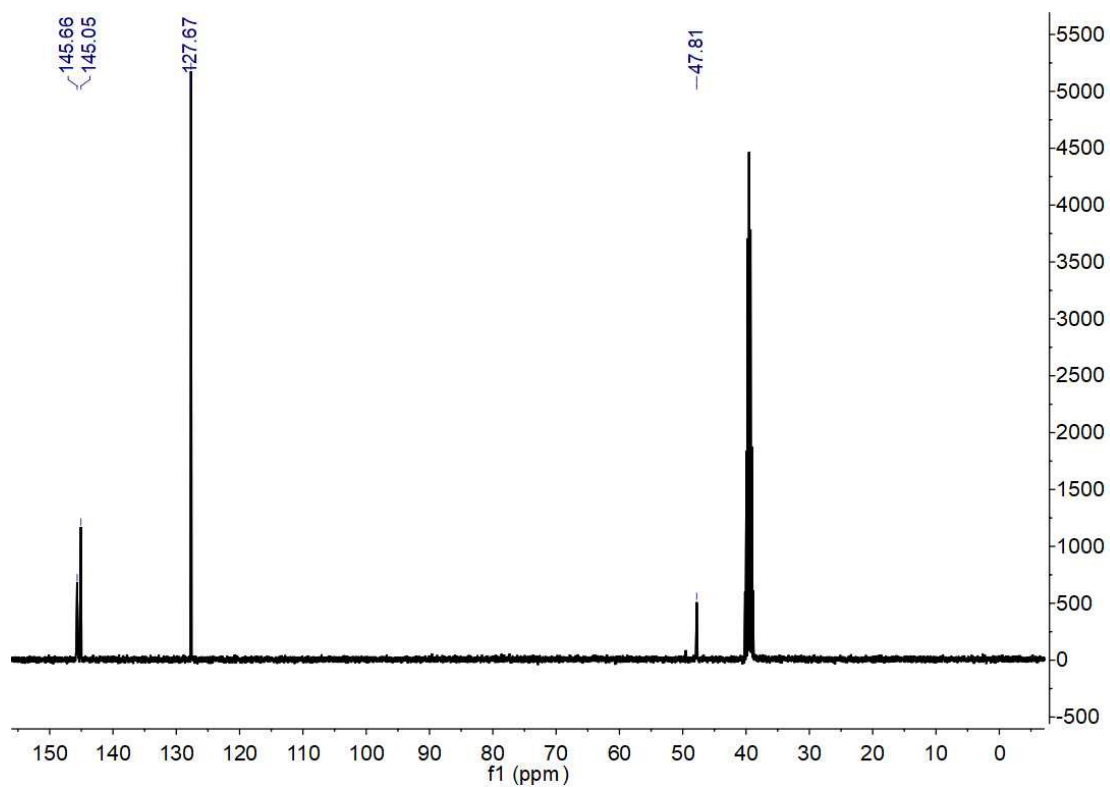

**Figure S14.** <sup>13</sup>C NMR (101 MHz, DMSO-d<sub>6</sub>, 298 K) spectrum of PC (3.0 mM).

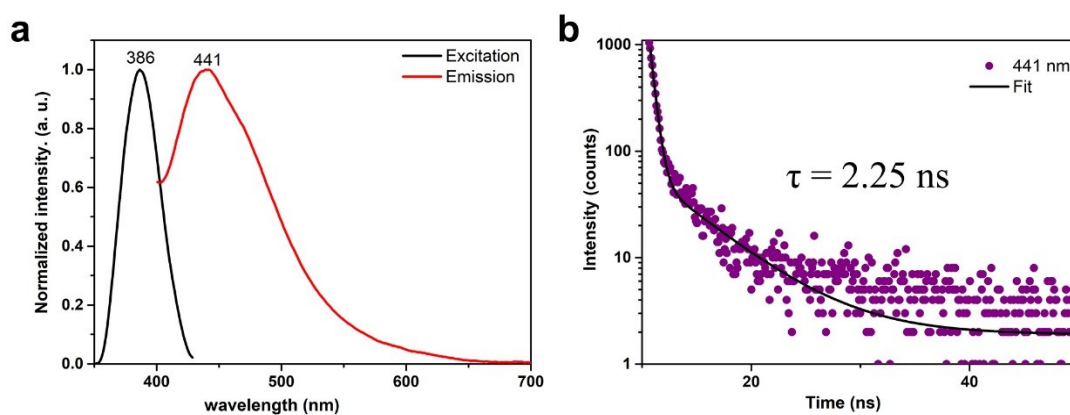

**Figure S15.** (a) Excitation and photoluminescence spectra of PBC in solid; (b) Time-resolved PL decay of PBC in solid at room temperature (@ 441 nm);

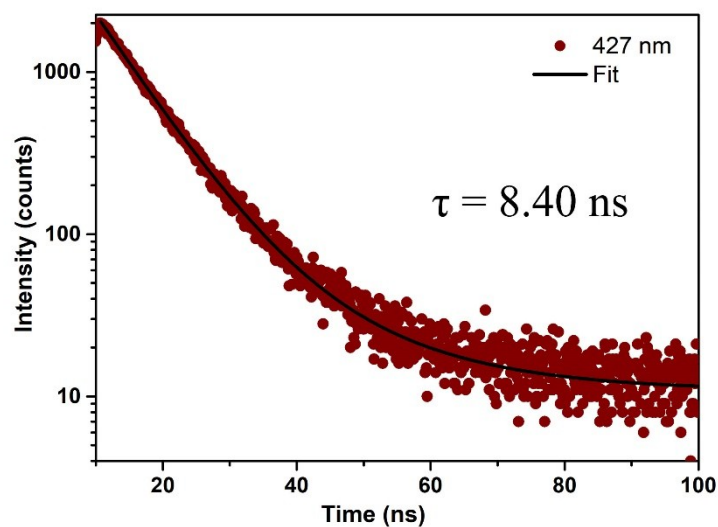

**Figure S16.** Time-resolved PL decay of PBC/CB[6] in solid at room temperature (@ 427 nm).

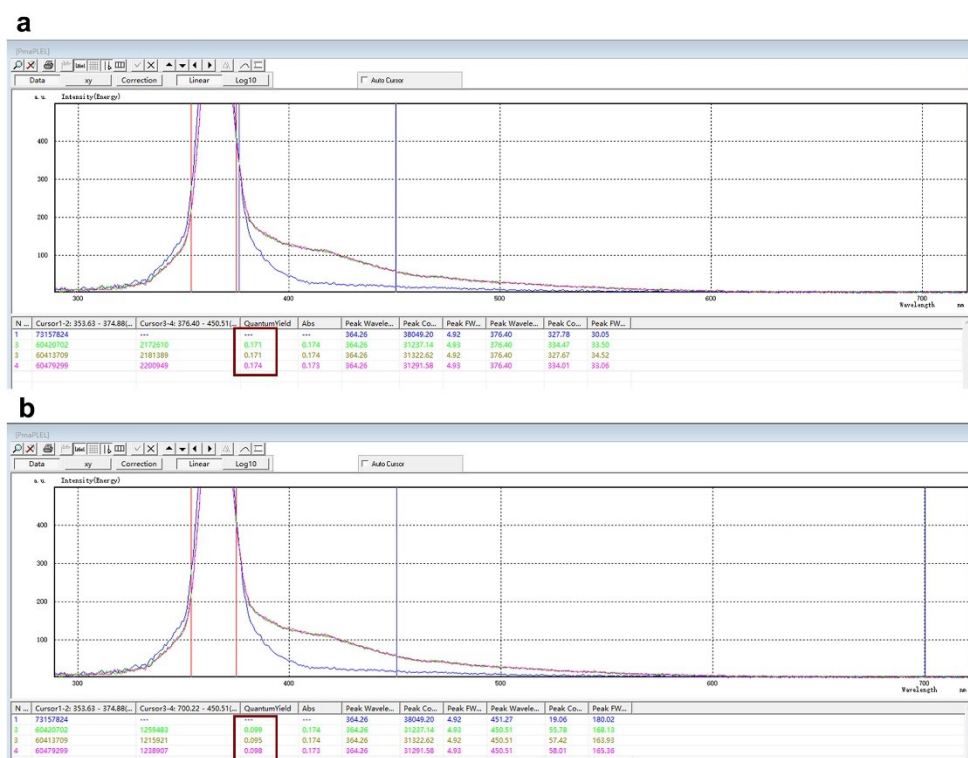

**Figure S17.** Fluorescence (a) and Phosphorescence (b) quantum efficiency of PBC/CB[6].

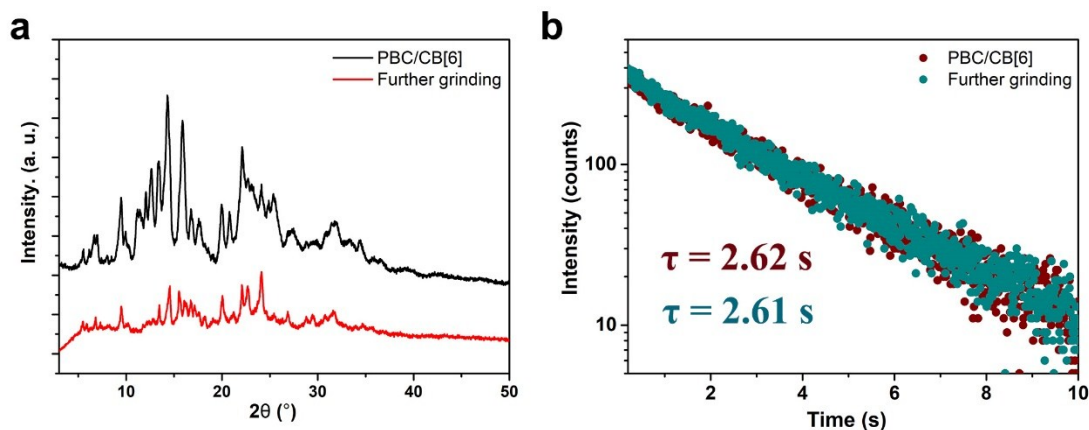

**Figure S18.** (a) XRD patterns of PBC/CB[6] without (black) and with (wine) further grinding; (b) Time-resolved PL decay of PBC/CB[6] without (wine) and with (cyan) further grinding.

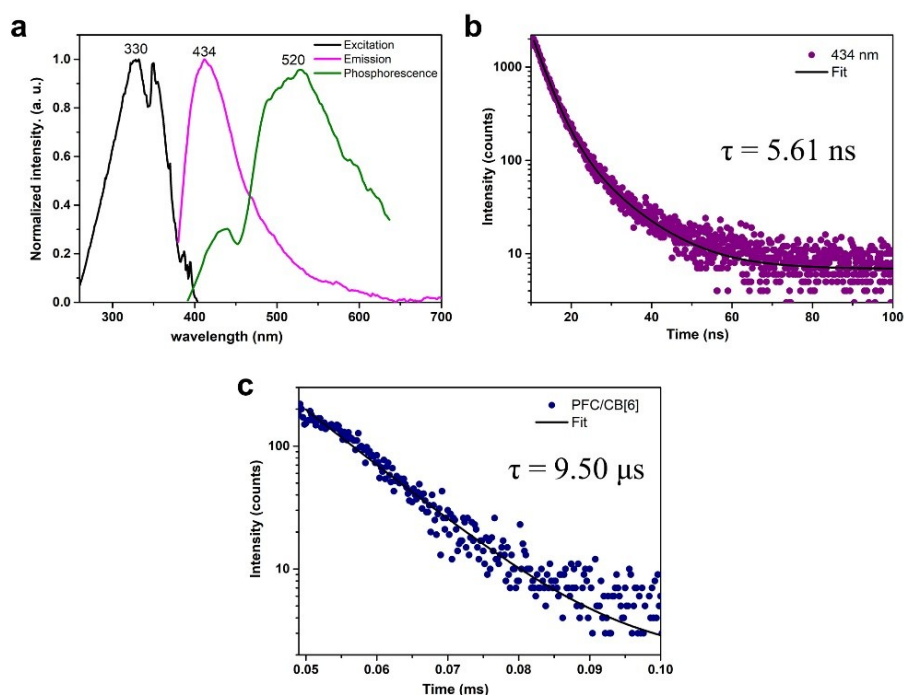

**Figure S19.** (a) Excitation, photoluminescence and phosphorescence spectra of PFC/CB[6] in solid; (b) Time-resolved PL decay of PFC/CB[6] in solid at room temperature (@ 434 nm); (c) Time-resolved PL decay of PFC/CB[6] in solid at room temperature (@ 520 nm).

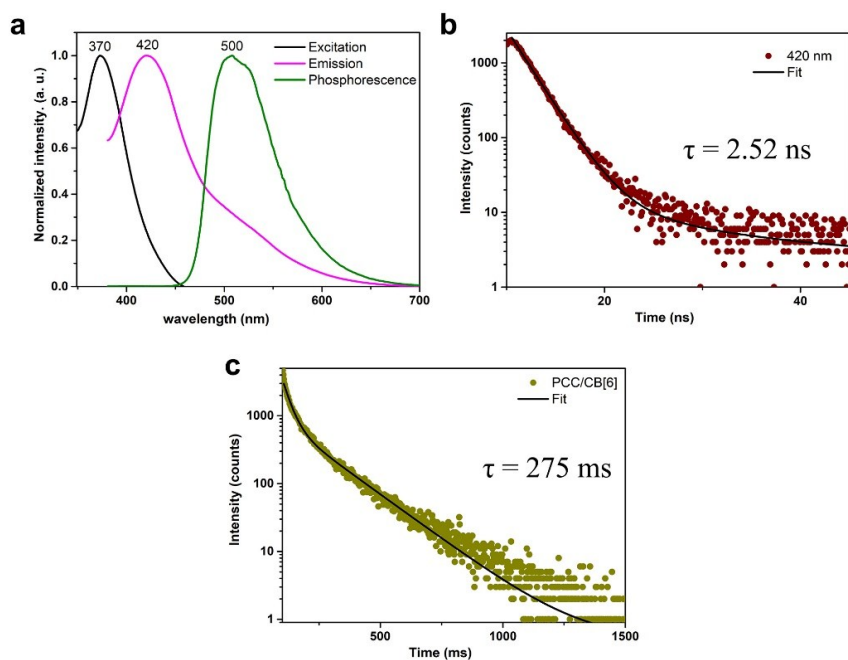

**Figure S20.** (a) Excitation, photoluminescence and phosphorescence spectra of PCC/CB[6] in solid; (b) Time-resolved PL decay of PCC/CB[6] in solid at room temperature (@ 420 nm); (c) Time-resolved PL decay of PCC/CB[6] in solid at room temperature (@ 500 nm).

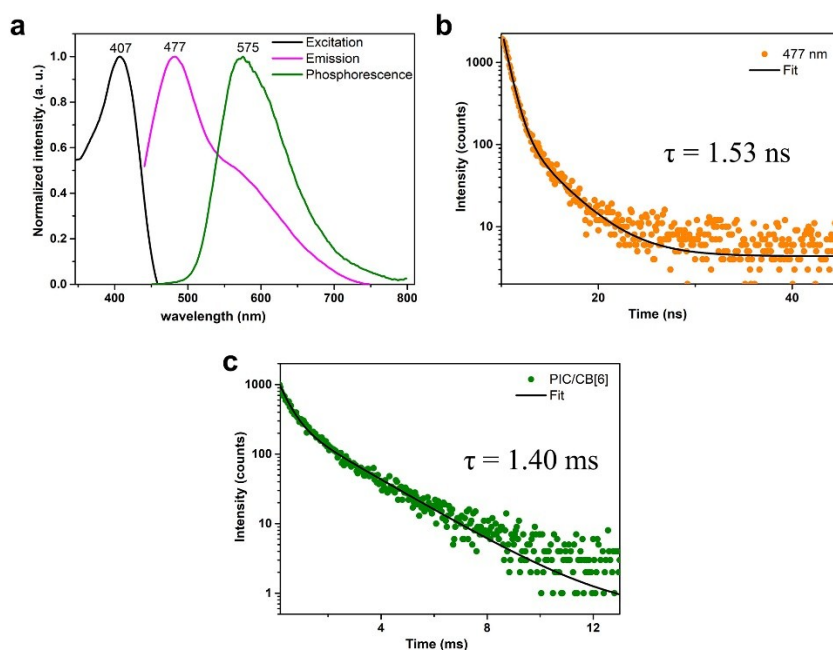

**Figure S21.** (a) Excitation, photoluminescence and phosphorescence spectra of PIC/CB[6] in solid; (b) Time-resolved PL decay of PIC/CB[6] in solid at room temperature (@ 477 nm); (c) Time-resolved PL decay of PIC/CB[6] in solid at room temperature (@ 575 nm).

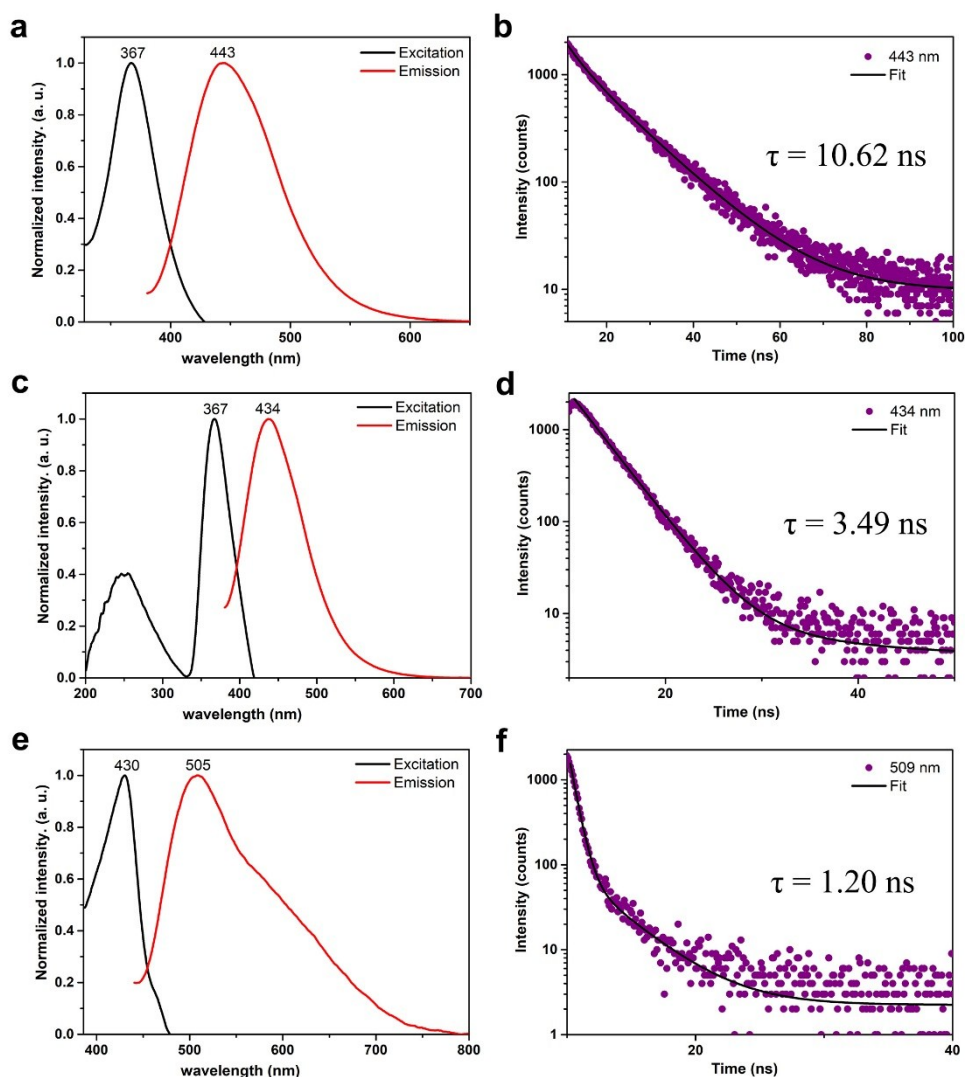

**Figure S22.** (a) Excitation and photoluminescence spectra of PFC in solid; (b) Time-resolved PL decay of PFC in solid at room temperature (@ 443 nm); (c) Excitation and photoluminescence spectra of PCC in solid; (d) Time-resolved PL decay of PCC in solid at room temperature (@ 434 nm); (e) Excitation and photoluminescence spectra of PIC in solid; (f) Time-resolved PL decay of PIC in solid at room temperature (@ 505 nm).

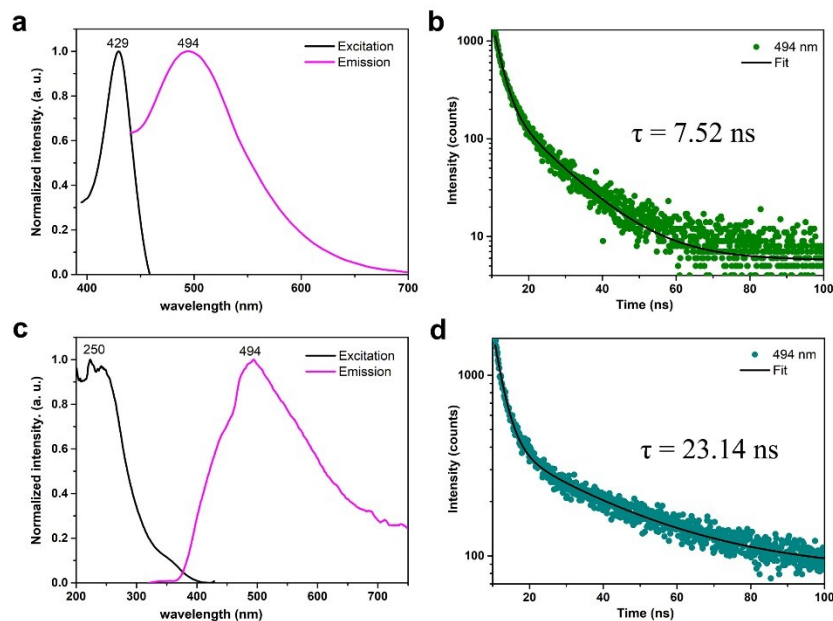

**Figure S23.** (a) Excitation and photoluminescence spectra of PEC/CB[6] in solid; (b) Time-resolved PL decay of PEC/CB[6] in solid at room temperature (@ 494 nm); (c) Excitation and photoluminescence spectra of PC/CB[6] in solid; (d) Time-resolved PL decay of PC/CB[6] in solid at room temperature (@ 494 nm).

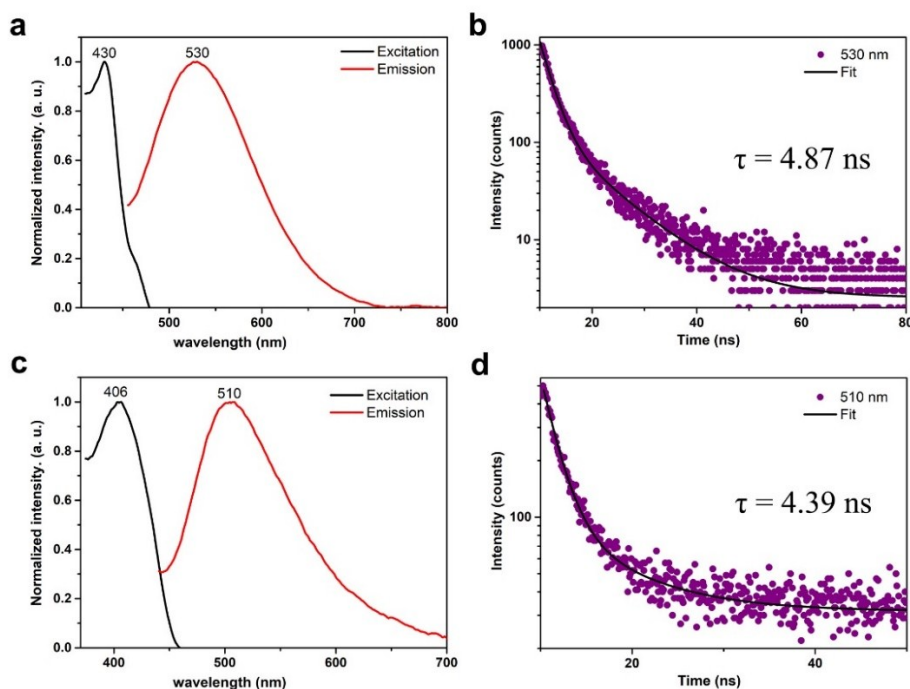

**Figure S24.** (a) Excitation and photoluminescence spectra of PEC in solid; (b) Time-resolved PL decay of PEC in solid at room temperature (@ 530 nm); (c) Excitation and photoluminescence spectra of PC in solid; (d) Time-resolved PL decay of PC in solid at room temperature (@ 510 nm).

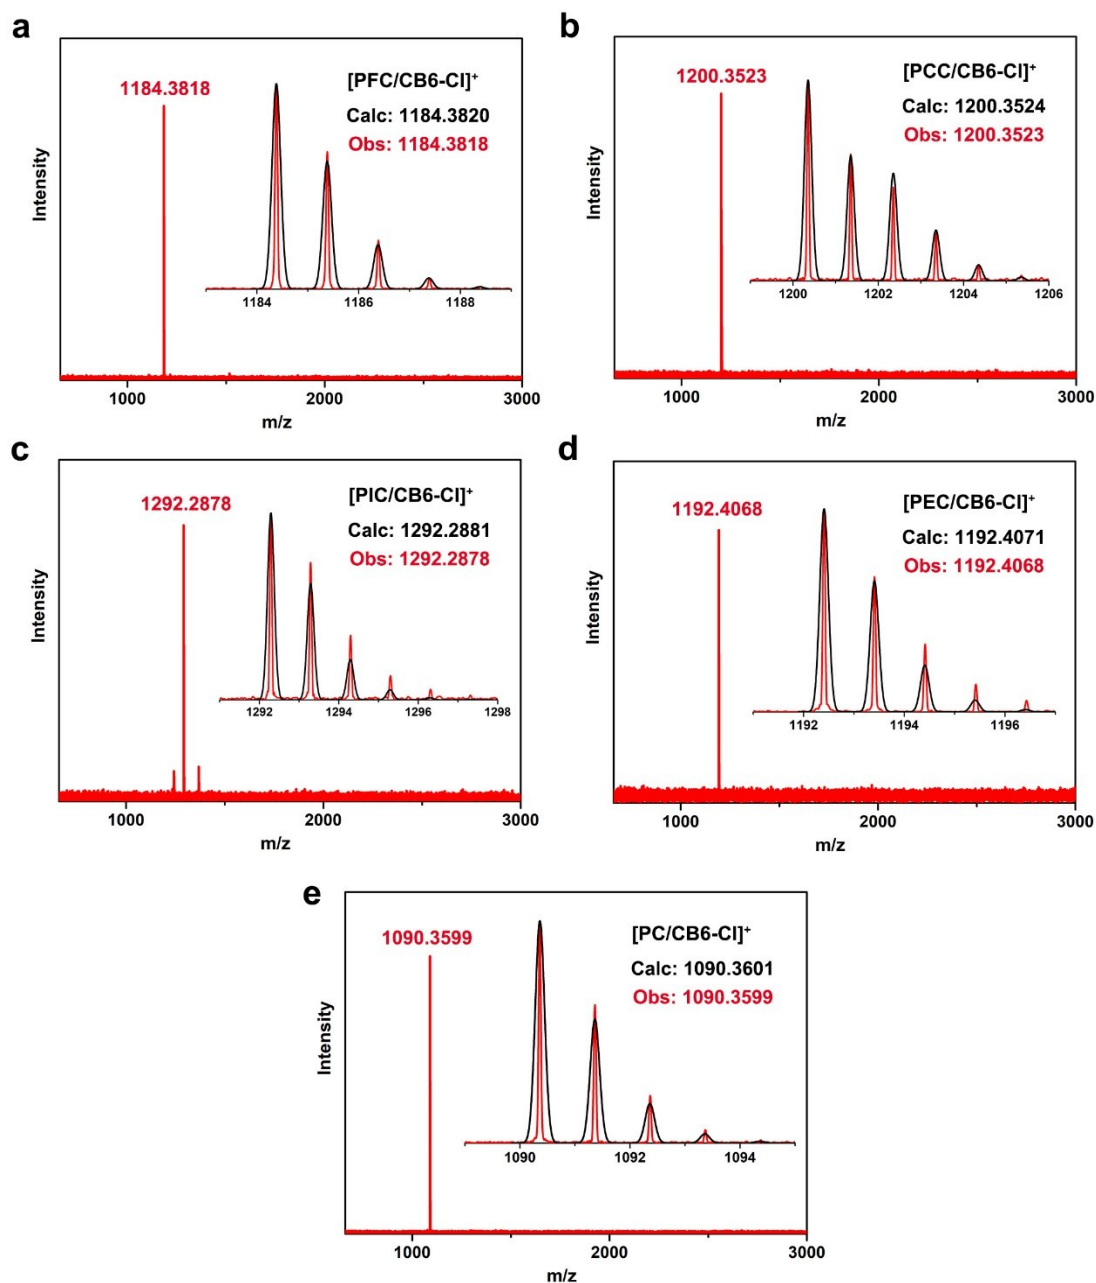

**Figure S25.** High resolution matrix-assisted laser desorption-ionization time of flight mass spectrometry (MALDI-TOF MS) of PX/CB[6] complexes. (a) PFC/CB[6]; (b) PCC/CB[6]; (c) PIC/CB[6]; (d) PEC/CB[6]; (e) PC/CB[6]; (Inset: zoomed peak; black: calculated data; red: observed data).

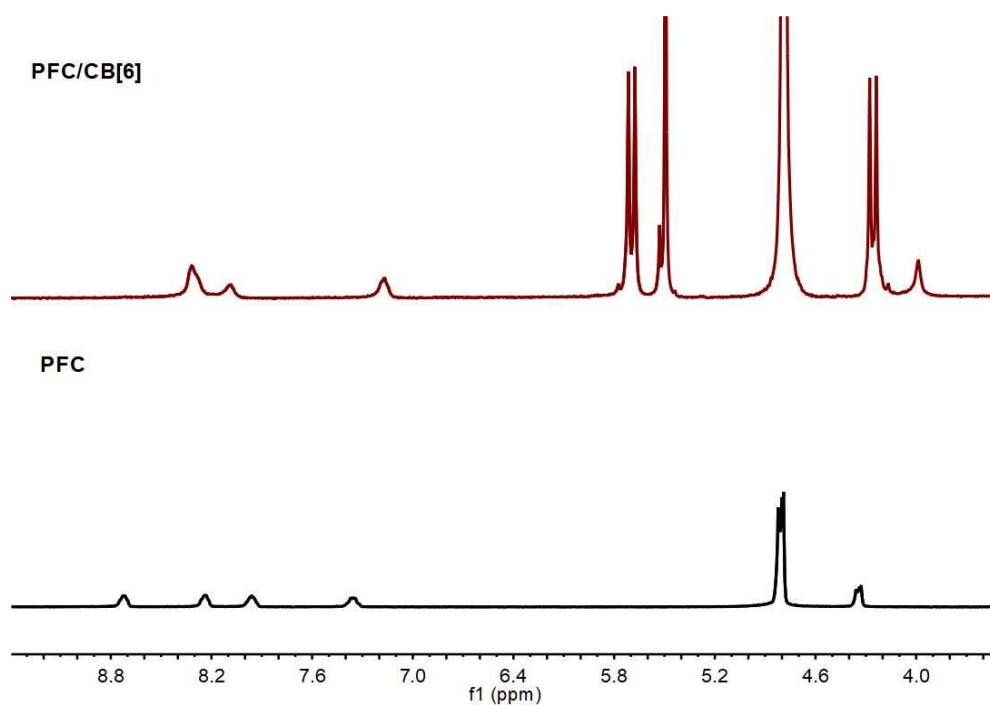

**Figure S26.**  $^1\text{H}$  NMR (400 MHz,  $\text{D}_2\text{O}$ , 298 K) spectra of PFC/CB[6] (maroon) and PFC (black).

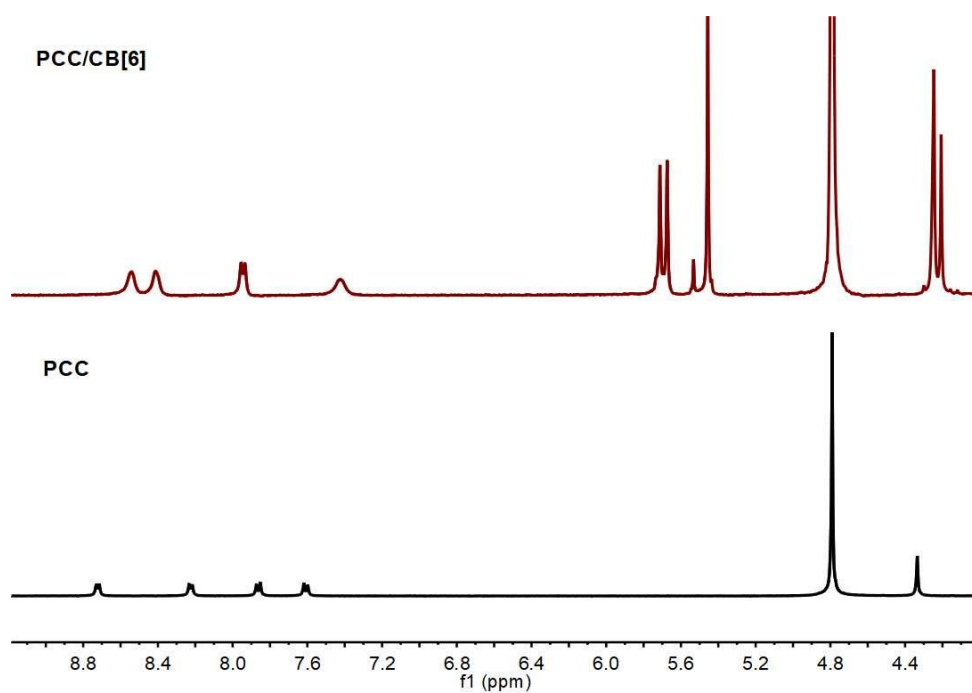

**Figure S27.**  $^1\text{H}$  NMR (400 MHz,  $\text{D}_2\text{O}$ , 298 K) spectra of PCC/CB[6] (maroon) and PCC (black).

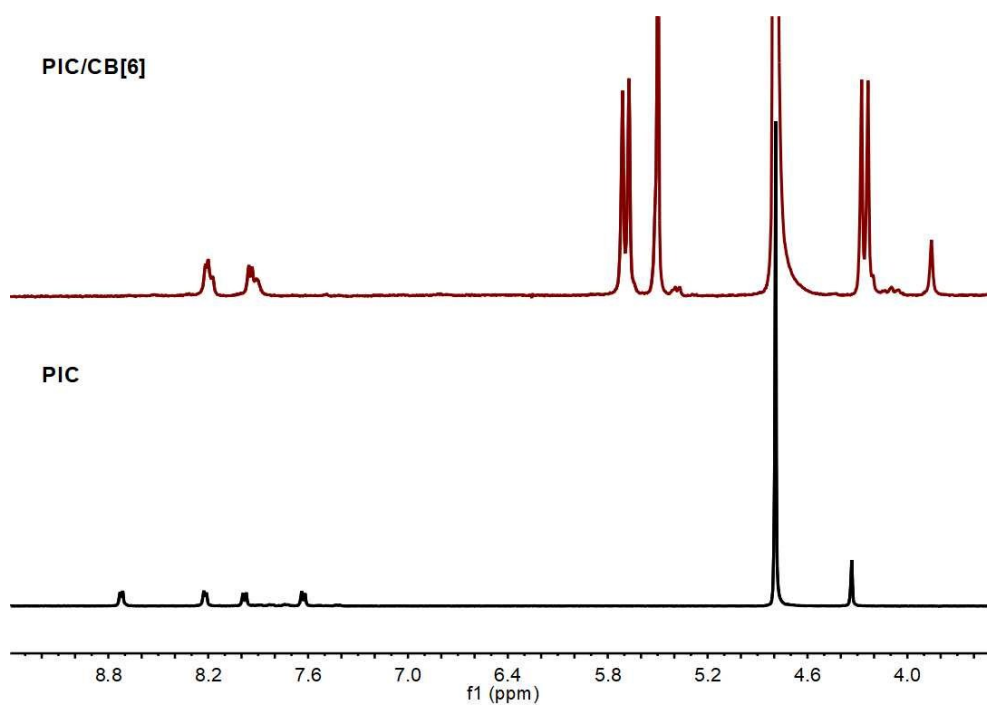

**Figure S28.** <sup>1</sup>H NMR (400 MHz, D<sub>2</sub>O, 298 K) spectra of PIC/CB[6] (maroon) and PIC (black).

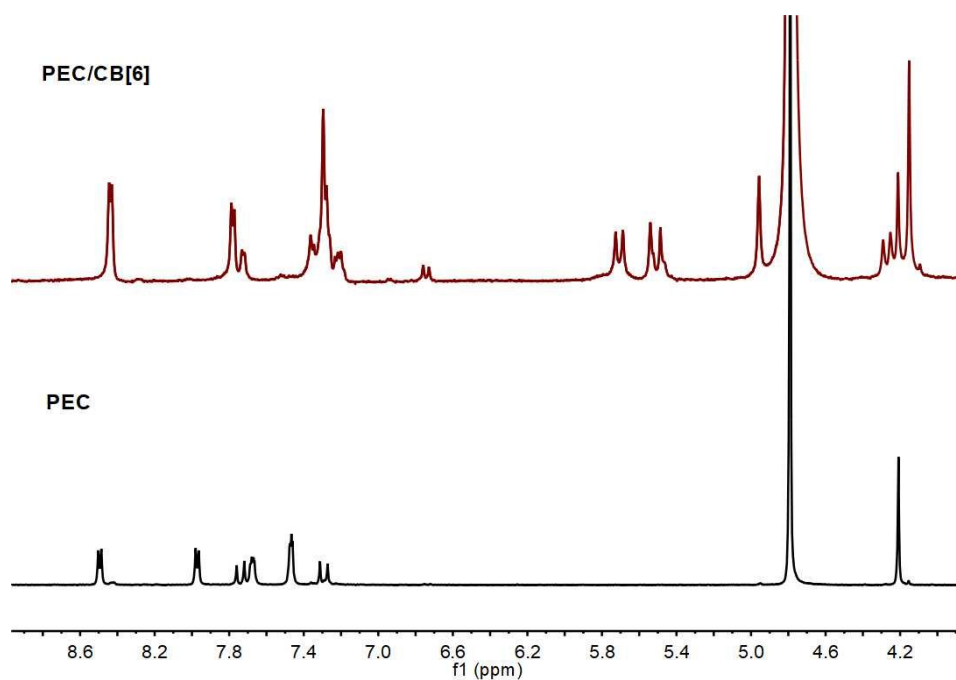

**Figure S29.** <sup>1</sup>H NMR (400 MHz, D<sub>2</sub>O, 298 K) spectra of PEC/CB[6] (maroon) and PEC (black).

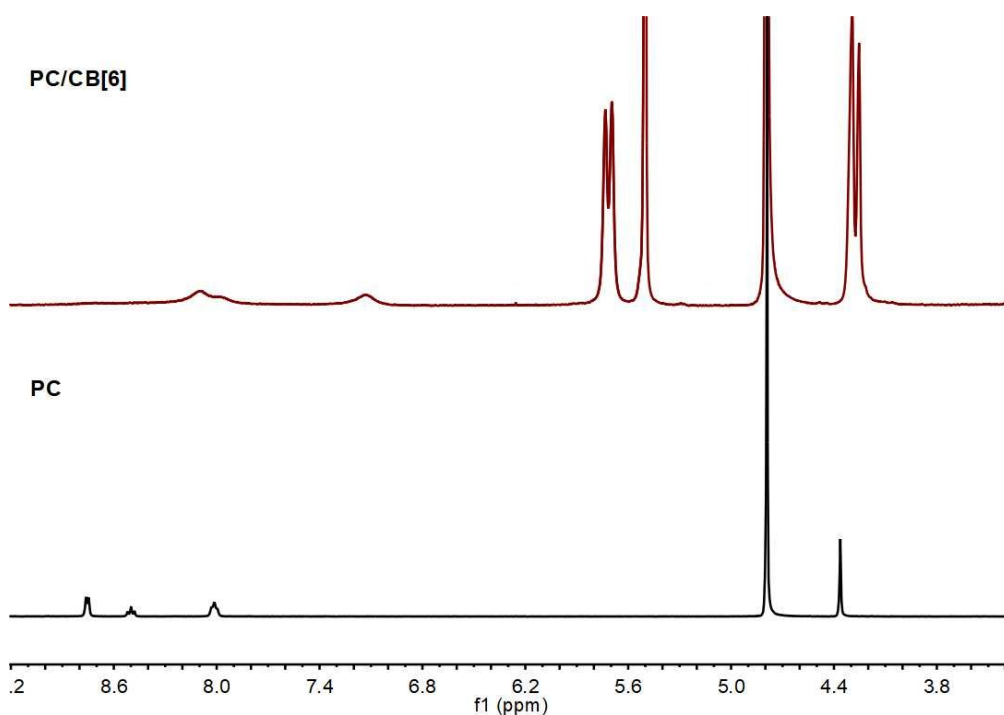

**Figure S30.**  $^1\text{H}$  NMR (400 MHz,  $\text{D}_2\text{O}$ , 298 K) spectra of PC/CB[6] (maroon) and PC (black).

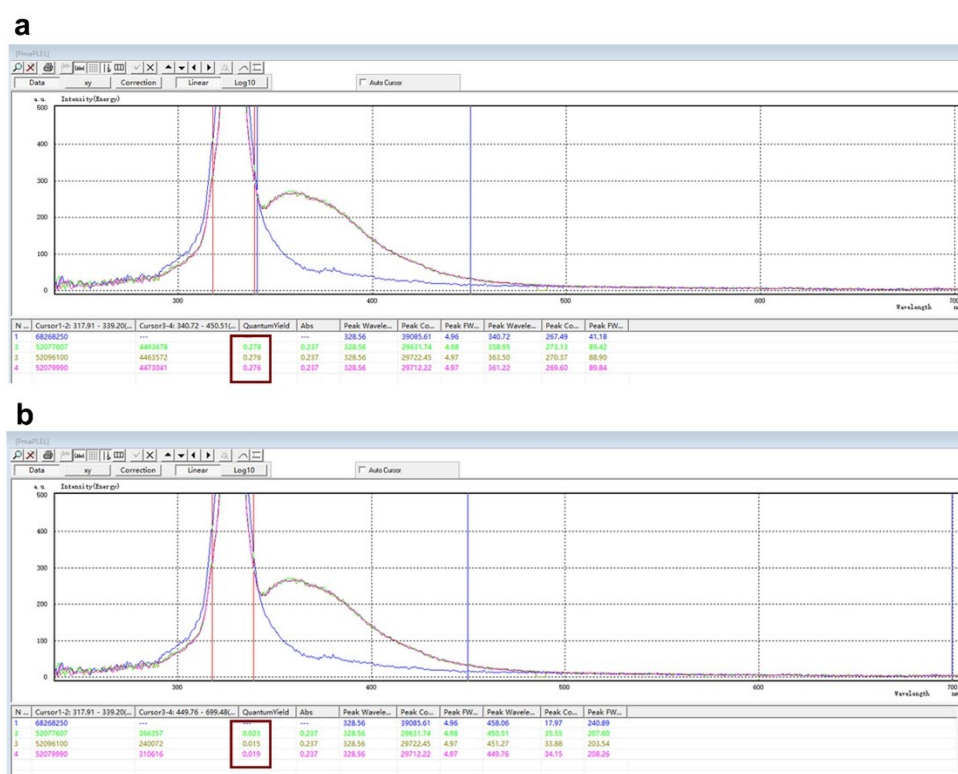

**Figure S31.** Fluorescence (a) and Phosphorescence (b) quantum efficiency of PFC/CB[6].

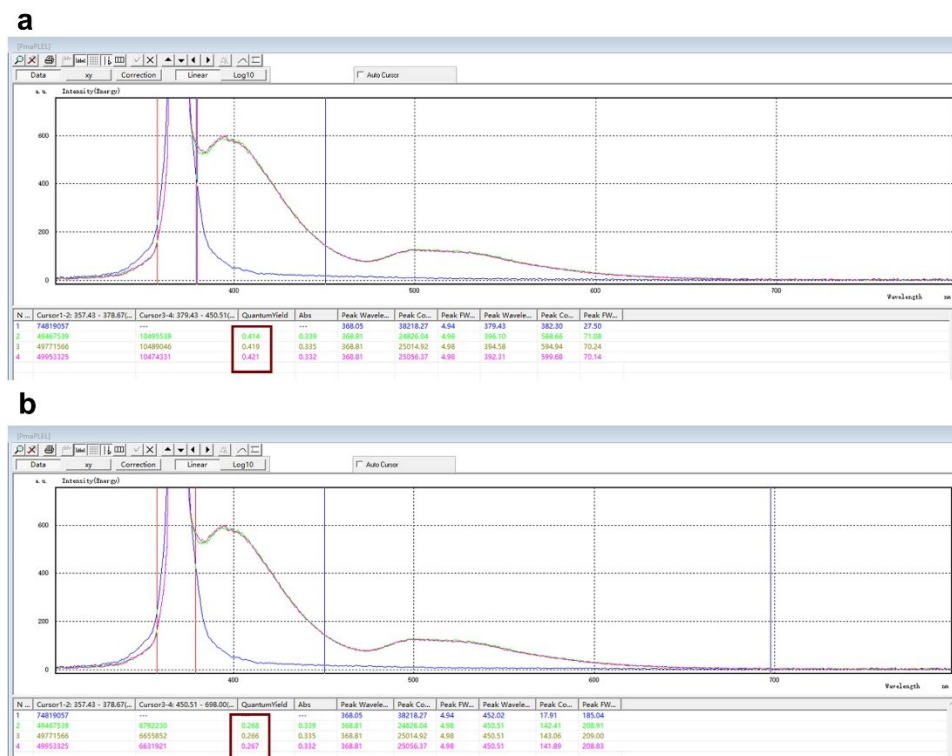

**Figure S32.** Fluorescence (a) and Phosphorescence (b) quantum efficiency of PCC/CB[6].

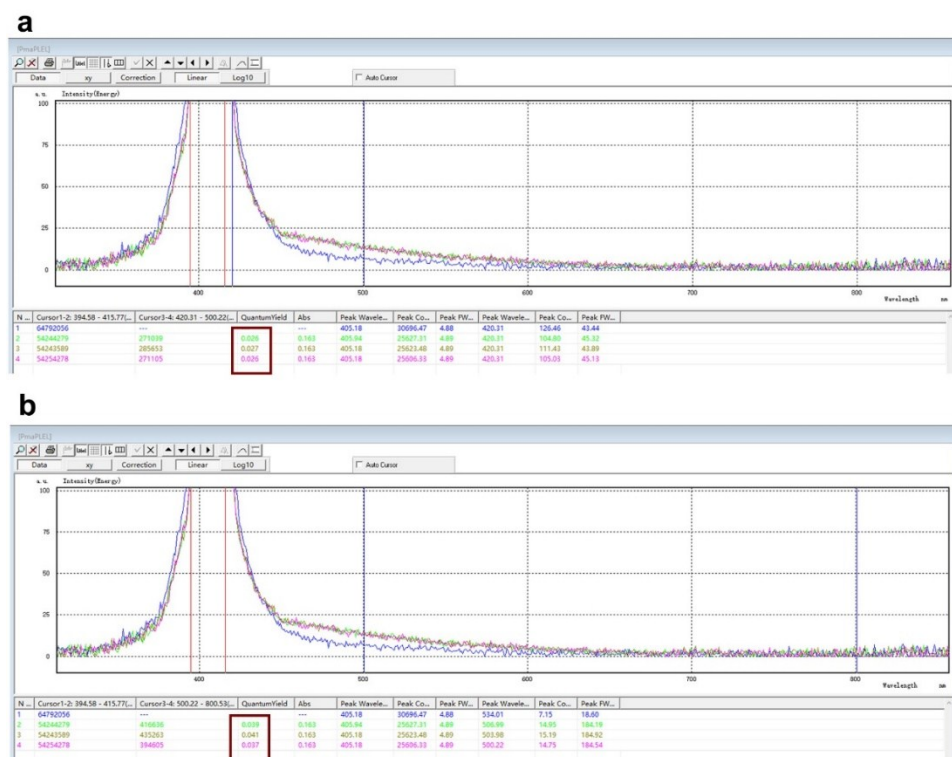

**Figure S33.** Fluorescence (a) and Phosphorescence (b) quantum efficiency of PIC/CB[6].
